# Supplementary material
Source: Springer Nature journal article supplement (https://www.springermedizin.de/resource/supplementary/12877_2008_130_MOESM4_ESM.pdf/9441236)
Supplement: MOESM4 [file 9441236]

# Summary meta-analysis plot [random effects]

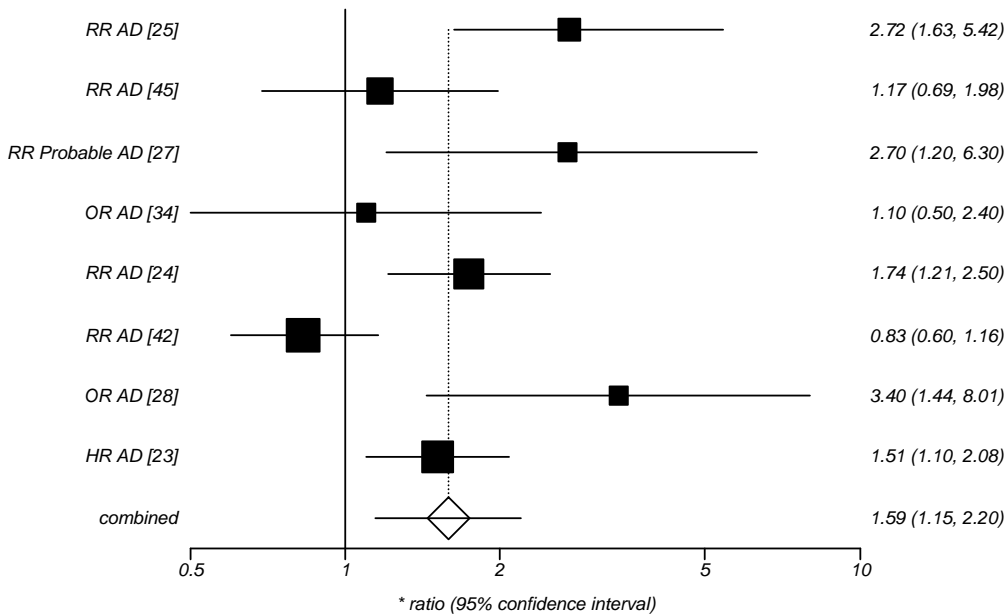

Smoking related  
to decreased risk

Smoking related  
to increased risk
